# Supplementary material
Source: Springer Nature journal article supplement (https://www.springermedizin.de/resource/supplementary/12885_2013_4478_MOESM1_ESM.pdf/9466528)
Supplement: MOESM1 [file 9466528]

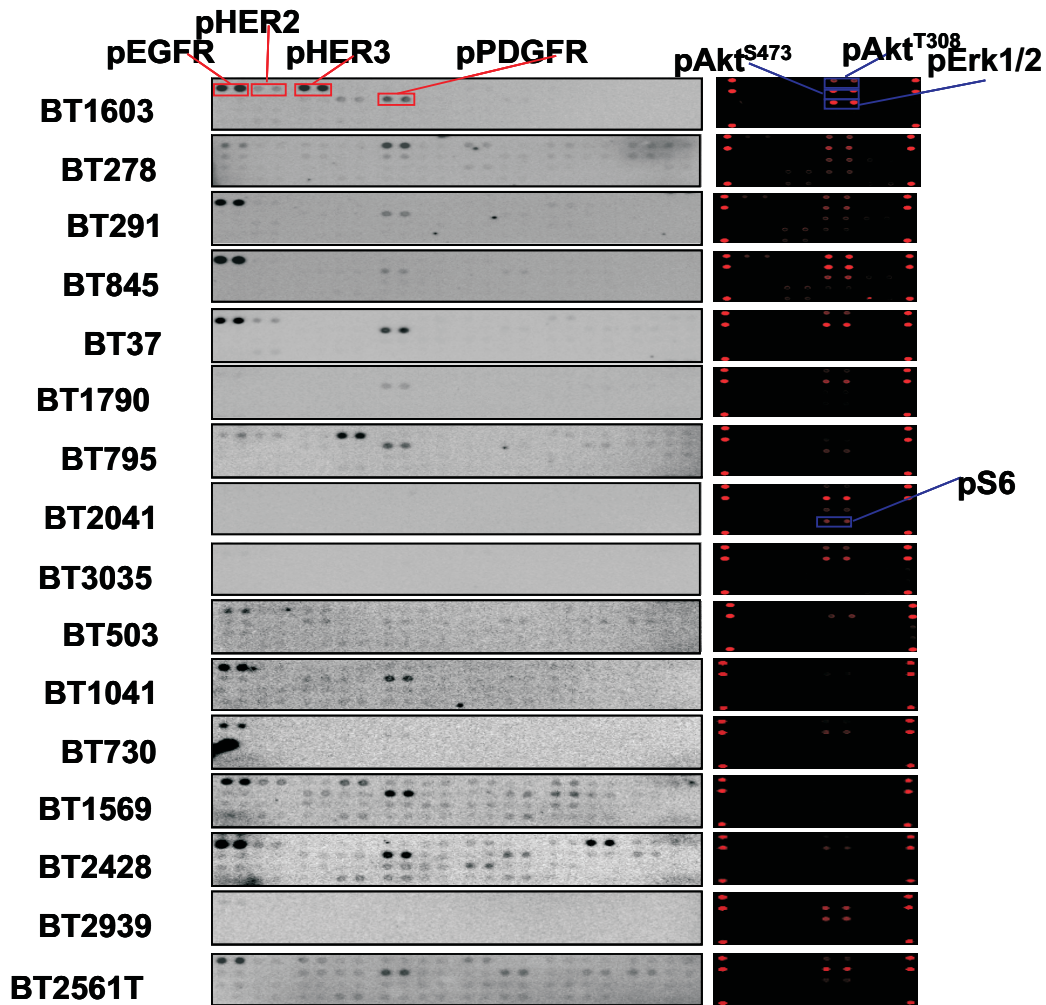

| Coordinate | RTK                | Coordinate | RTK       |
|------------|--------------------|------------|-----------|
| A1,A2      | EGFR               | C1,C2      | Tie-2     |
| A3,A4      | ErbB2              | C3,C4      | TrkA      |
| A5,A6      | ErbB3              | C5,C6      | TrkB      |
| A7,A8      | ErbB4              | C7,C8      | TrkC      |
| A9,A10     | EGFR1              | C9,C10     | VEGFR1    |
| A11,A12    | EGFR2a             | C11,C12    | VEGFR2    |
| A13,A14    | EGFR3              | C13,C14    | VEGFR3    |
| A15,A16    | EGFR4              | C15,C16    | MuSK      |
| A17,A18    | Insulin R          | C17,C18    | EphA1     |
| A19,A20    | IGF-1R             | C19,C20    | EphA2     |
| A21,A22    | Axl                | C21,C22    | EphA3     |
| A23,A24    | Dtk                | C23,C24    | EphA4     |
| B1,B2      | Mer                | D1,D2      | EphA6     |
| B3,B4      | HGFR               | D3,D4      | EphA7     |
| B5,B6      | MSPR               | D5,D6      | EphB1     |
| B7,B8      | PDGFR <sub>α</sub> | D7,D8      | EphB2     |
| B9,B10     | PDGFR <sub>β</sub> | D9,D10     | EphB4     |
| B11,B12    | SCFR               | D11,D12    | EphB6     |
| B13,B14    | Flt-3              | D13,D14    | M.IgG1    |
| B15,B16    | M-CESR             | D15,D16    | M.IgG1 2A |
| B17,B18    | c-Ret              | D17,D18    | M.IgG1 2B |
| B19,B20    | ROR1               | D19,D20    | G.IgG     |
| B21,B22    | ROR2               | D21,D22    | PBS       |
| B23,B24    | Tie-1              |            |           |

| Coordinate | Substrate  | Coordinate | Substrate   |
|------------|------------|------------|-------------|
| A1         | Control +  | D1         | Control -   |
| A2,A3      | EphA1      | D2,D3      | EphB1       |
| A4,A5      | EphB4      | D4,D5      | Tie2/TEK    |
| A6,A7      | Akt T308   | D6,D7      | S6 S235/236 |
| A8,A9      | IRS-1      | D8,D9      | Lck         |
| A10        | Control +  | D10        | Stat3       |
| B1         | Control +  | E1         | Control +   |
| B2,B3      | EphA2      | E2,E3      | EphB3       |
| B4,B5      | Tyro-3/Dtk | E4,E5      | VEGFR2      |
| B6,B7      | Akt S473   | E6,E7      | C-Abl       |
| B8,B9      | Zap-70     | E8,E9      | Stat1       |
| B10        | Control +  | E10        | Control +   |
| C1         | Control -  |            |             |
| C2,C3      | EphA3      |            |             |
| C4,C5      | Axl        |            |             |
| C6,C7      | ERK1/2     |            |             |
| C8,C9      | Src        |            |             |
| C10        | Stat3      |            |             |

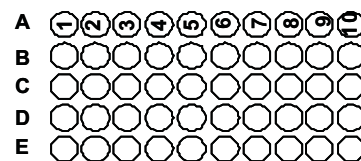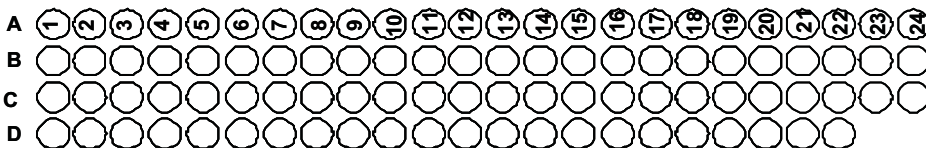

Supplementary Figure 1
